# Supplementary material for: EEG Alpha Band Responses Reveal Amplification Benefits in Infants with Hearing Loss
Source: MDPI journal article supplement (doi:10.3390/children10030600), 2023-03-21
Supplement: s1 [file s1]

# EEG Alpha Band Responses Reveal Amplification Benefits in Infants with Hearing Loss

Kristin Uhler <sup>1,\*</sup>, Daniel J. Tollin <sup>2</sup> and Phillip M. Gilley <sup>1,3,†</sup>

<sup>1</sup> Department of Physical Medicine and Rehabilitation, University of Colorado Anschutz School of Medicine & Children's Hospital Colorado, Aurora, CO 80045, USA

<sup>2</sup> Department of Physiology and Biophysics, University of Colorado Anschutz School of Medicine, Aurora, CO 80045, USA

<sup>3</sup> Institute of Cognitive Science, University of Colorado Boulder, Boulder, CO 80309, USA

\* Correspondence: kristin.uhler@cuanschutz.edu.

† These authors contributed equally to this work.

## Hearing Aid Verification

Participant hearing aids were programmed to prevent unnecessary signal distortion and managing audiologists confirmed that all participants' hearing aids were programmed using Desired Sensation Level v5.0.1. Participant's match to Desired Sensation Level targets was used to categorize how well hearing aids were fit. Fit was considered poor if at least one hearing aid deviated from the prescriptive target by  $\geq 5$  dB at 3 frequencies.<sup>2,3</sup> The majority of infants' hearing aids met prescriptive gain targets ( $n = 35$ ), four infants hearing aids did not meet prescriptive gain targets, and two could not be measured due to real ear equipment malfunctioning (Supplementary Table S1). Of the four children who did not meet the prescriptive gain targets, two had excellent audibility per aided speech intelligibility and two likely did not meet targets due to moderately severe to profound degrees of hearing loss.

Hearing aids were assessed using an electroacoustic test box measure before laboratory testing to ensure proper function. Verification of amplification was done using simulated real-ear response measurements which were compared to age-specific Desired Sensation Level targets using real-ear to coupler differences. When real-ear to coupler differences could not be recorded from at least one ear, average values for age specific real-ear to coupler differences were substituted. Aided speech intelligibility index is used to evaluate hearing aid programming based on hearing thresholds by either measuring output of the hearing aid in a child's ear canal or in a test box. The hearing aid output is compared to standard, age-based output targets measured in response to a standardized speech signal.<sup>4</sup> The aided speech intelligibility was automatically calculated at 50-, 60-, and 70-dB SPL using the Audioscan Verifit. Aided speech intelligibility considers the speech spectrum (0 = no access to speech spectrum; 1 = full access to the speech spectrum) that is accessible for participants given their hearing thresholds, ear canal size and shape, and their hearing aid output as measured in the child's ear canal in dB SPL. Because our stimuli were presented at 70 dB SPL, we used the output at that level for aided speech intelligibility, which ranged from 0.45 to 0.95 ( $M = 0.82$ ,  $s.d. = 0.11$ ; see Supplementary Table S1).

**Table S1.** EEG alpha band responses reveal amplification benefit in infants with hearing loss: Hearing aid details.

| ID | Sex | Age ID (days) | Age HA Fit (mo) | Age at MMR (mo) | HA Make | HA Model       | Better Ear | PTA | Aided SII at 70 dB |
|----|-----|---------------|-----------------|-----------------|---------|----------------|------------|-----|--------------------|
| 36 | M   | 37            | 1.91            | 3.84            | Phonak  | Sky B70P       | Left       | 20  | 0.93               |
| 12 | M   | 48            | 2.33            | 2.89            | Oticon  | SenseiPro90    | Left       | 23  | 0.86               |
| 35 | F   | 105           | 4.14            | 4.70            | Phonak  | SkyB70P        | Right      | 24  | 0.89               |
| 8  | M   | 36            | 1.84            | 2.43            | Phonak  | SkyV70P        | Right      | 26  | 0.93               |
| 15 | F   | 56            | 3.48            | 4.60            | Phonak  | SkyV70P        | Left       | 26  | 0.89               |
| 39 | F   | 18            | 1.28            | 1.90            | Phonak  | Sky V50 P      | Left       | 26  | 0.89               |
| 17 | F   | 19            | 1.12            | 1.74            | Phonak  | SkyV70P        | Left       | 28  | 0.90               |
| 14 | F   | 36            | 2.43            | 3.61            | Phonak  | SkyV70M        | Right      | 29  | 0.85               |
| 27 | F   | 41            | 3.38            | 3.51            | Phonak  | SkyB50P        | Right      | 29  | 0.86               |
| 18 | M   | 60            | 2.17            | 3.71            | Phonak  | SkyV70P        | Left       | 31  | 0.86               |
| 7  | M   | 31            | 1.78            | 1.81            | Oticon  | Sensei Pro     | Right      | 33  | ER                 |
| 9  | F   | 66            | 3.78            | 5.09            | Phonak  | SkyV70P        | Left       | 34  | 0.95               |
| 33 | F   | 47            | 2.96            | 3.15            | Oticon  | SenseiPro90    | Right      | 34  | 0.89               |
| 25 | M   | 43            | 2.99            | 5.91            | Phonak  | SkyV70P        | Left       | 36  | 0.86               |
| 30 | M   | 26            | 2.46            | 3.12            | Oticon  | SenseiPro90    | Left       | 36  | 0.86               |
| 3  | M   | 21            | 2.23            | 2.92            | Phonak  | SkyV50P        | Left       | 38  | 0.88               |
| 4  | M   | 59            | 6.17            | 6.31            | Phonak  | SkyV50M13      | Right      | 39  | 0.95               |
| 20 | M   | 26            | 2.76            | 4.24            | Oticon  | SenseiPro90    | Left       | 40  | 0.84               |
| 26 | F   | 46            | 2.43            | 3.94            | Phonak  | SkyV70M        | Left       | 41  | 0.85               |
| 37 | M   | 39            | 1.84            | 3.55            | Phonak  | Sky B70M       | Right      | 41  | 0.83               |
| 1  | F   | 43            | 2.10            | 2.43            | Oticon  | SenseiPro90    | Right      | 43  | 0.89               |
| 29 | F   | 59            | 3.35            | 4.99            | Phonak  | SkyV70SP       | Left       | 43  | 0.83               |
| 10 | M   | 20            | 3.12            | 3.62            | Phonak  | SkyV70P        | Left       | 44  | 0.80               |
| 11 | F   | 36            | 2.43            | 3.98            | Phonak  | SkyV70P        | Left       | 44  | 0.82               |
| 19 | F   | 23            | 2.23            | 2.69            | Phonak  | SkyV50P        | Right      | 44  | 0.87               |
| 5  | M   | 47            | 3.16            | 4.11            | Phonak  | Nios SIII      | Right      | 46  | 0.84               |
| 34 | F   | 74            | 4.01            | 4.70            | Phonak  | SkyB70M        | Right      | 46  | 0.82               |
| 32 | F   | 35            | 1.84            | 2.63            | ReSound | UPS777DLW      | Left       | 49  | 0.82               |
| 24 | M   | 47            | 2.69            | 5.49            | Phonak  | SkyV50SP       | Right      | 50  | 0.77               |
| 38 | M   | 52            | 2.86            | 2.96            | Phonak  | Sky B70P       | equal      | 51  | 0.78               |
| 28 | F   | 35            | 2.73            | 5.62            | Phonak  | SkyV70P        | Right      | 53  | 0.82               |
| 13 | M   | 74            | 2.69            | 4.01            | Phonak  | SkyV70P        | Left       | 54  | 0.78               |
| 23 | M   | 44            | 2.27            | 5.75            | Phonak  | Sky V70P       | Right      | 55  | 0.86               |
| 22 | F   | 35            | 2.04            | 3.55            | Phonak  | SkyV70M        | Left       | 56  | 0.77               |
| 31 | F   | 36            | 4.83            | 5.52            | Phonak  | SkyB70P        | Left       | 59  | 0.81               |
| 16 | M   | 24            | 2.37            | 3.38            | Phonak  | SkyV70SP       | Right      | 61  | 0.71               |
| 41 | M   | 33            | 1.61            | 4.07            | Phonak  | Sky B50-UP     | Right      | 75  | 0.45               |
| 2  | F   | 42            | 1.84            | 2.56            | Phonak  | SkyV70         | Right      | 78  | ER                 |
| 6  | F   | 25            | 3.88            | 4.63            | Phonak  | SkyV90SP       | Right      | 85  | 0.52               |
| 21 | M   | 27            | 2.60            | 4.30            | Phonak  | Naida SIII UP  | Left       | 95  | 0.57               |
| 40 | F   | 38            | 2.66            | 3.88            | Oticon  | Opn 1 Play BTE | Left       | 38  | 0.81               |

\*Note: ID = participant identifier, Age ID = age at identification of hearing loss in days, Age HA Fit = age at hearing aid (HA) fit in months, Age at MMR = age at MMR testing in months, Better Ear = better hearing ear based on four frequency pure tone average (4-Freq PTA, in dB eHL), estimated sensation level (SL) and aided speech intelligibility (Aided SII) measured at 70 dB. For two subjects

there was an equipment malfunction (EM) and the aided speech intelligibility could not be measured at time of MMR. Subjects in blue did not have usable EEG data.

**Disclaimer/Publisher's Note:** The statements, opinions and data contained in all publications are solely those of the individual author(s) and contributor(s) and not of MDPI and/or the editor(s). MDPI and/or the editor(s) disclaim responsibility for any injury to people or property resulting from any ideas, methods, instructions or products referred to in the content.
